# Supplementary material for: Human defects in STAT3 promote oral mucosal fungal and bacterial dysbiosis
Source: JCI journal article supplement (doi:10.1172/jci.insight.122061), 2018-09-05
Supplement: sd1 [file 1]

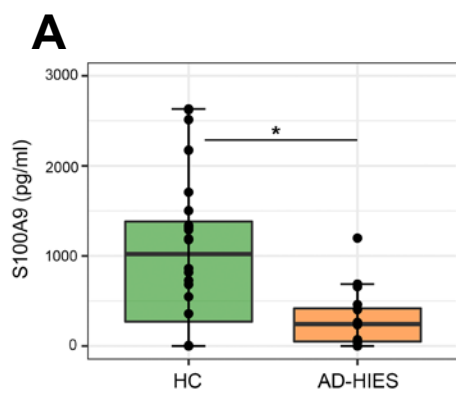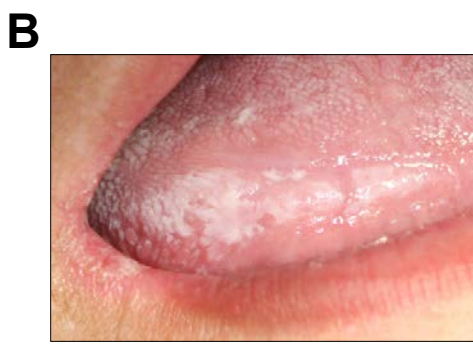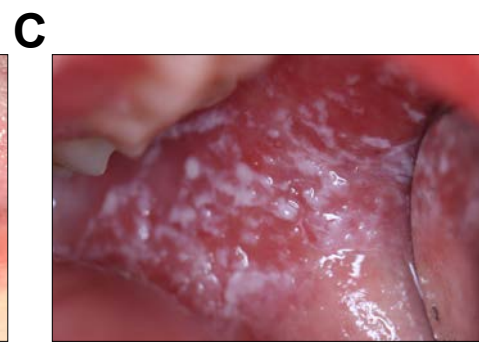

**Supplementary Figure 1. Defects in STAT3-mediated immunity in AD-HIES are associated recurrent candidiasis.** A) Quantification of S100A9 protein (constituent of Calprotectin; S100A8/9) in saliva of patients with Autosomal-Dominant Hyper IgE Syndrome (AD-HIES, n=16) and healthy controls (HC, n=24). \*  $P < 0.01$  as determined by Mann-Whitney test. Boxes extend from the 25<sup>th</sup> to 75<sup>th</sup> percentiles and the whiskers were plotted from the minimum to maximum value. All outlying values were shown. B) Representative image of oral candidiasis in a AD-HIES patient affecting the tongue dorsum. C) Representative image of oral candidiasis in a AD-HIES patient affecting the buccal mucosa.

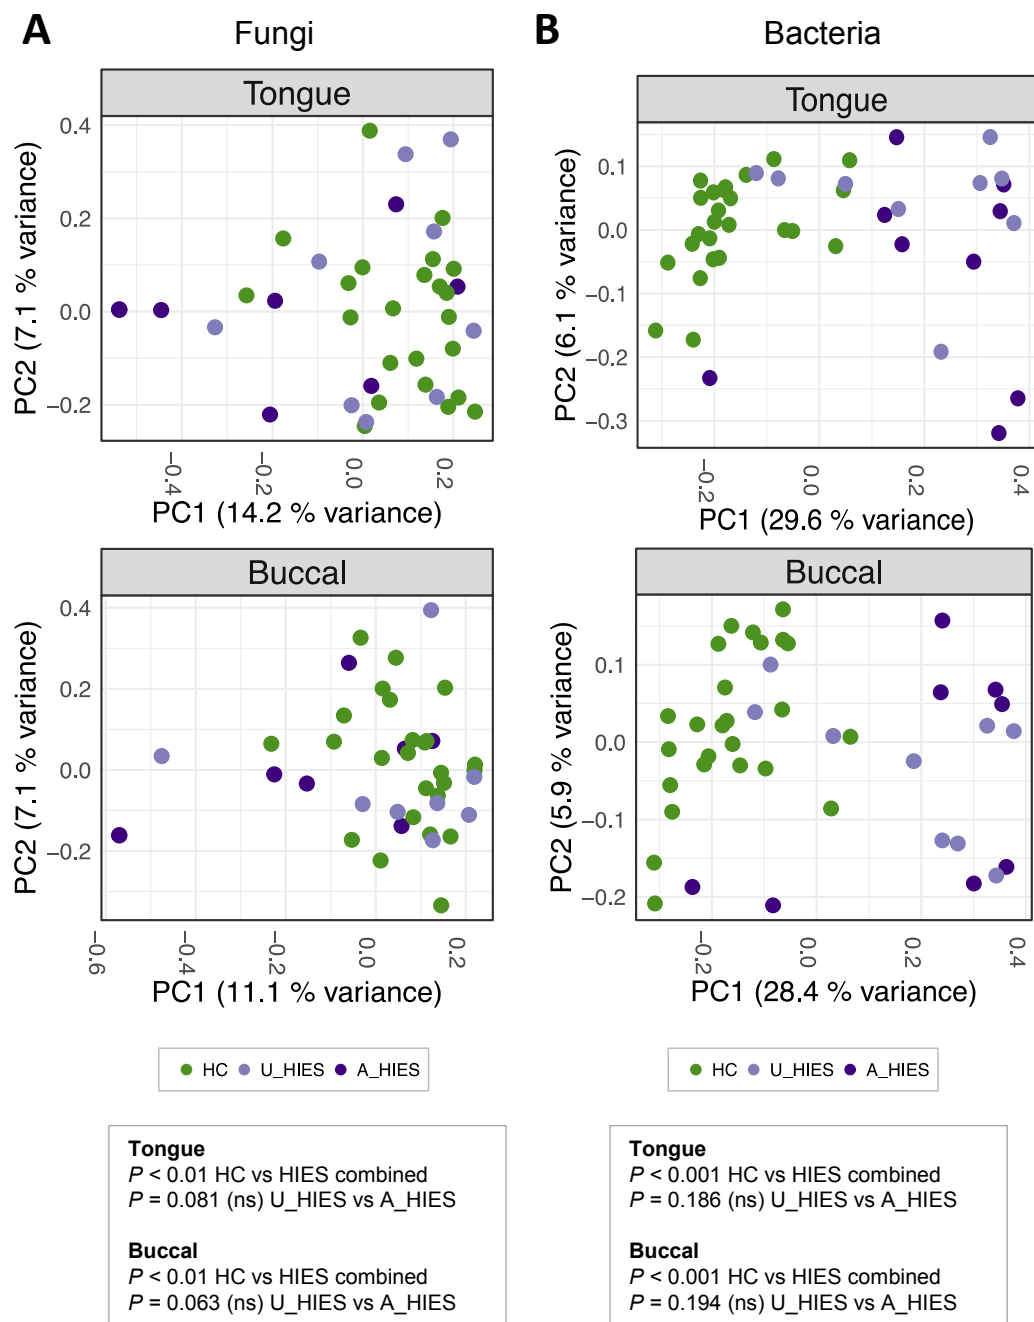

**Supplementary Figure 2. Fungal and bacterial communities from AD-HIES patients separate from healthy controls according to community membership.** Graphs depict Principal Coordinate Analysis (PCoA) plots of community membership (based on the Jaccard Index). (A) Fungal communities and (B) bacterial communities from tongue and buccal sites. Each circle represents one sample. (A and B) The number of samples per group included in graphs of fungal communities for healthy controls (HC) were  $n=23$  for tongue and  $n=25$  for buccal. For Uninfected AD-HIES (U\_HIES) and actively infected AD-HIES (A\_HIES), the number of samples was  $n=9$  for tongue and  $n=8$  for buccal for both groups. The number of samples per group included in graphs of bacterial communities were for HC,  $n=25$  for tongue and buccal, for U\_HIES  $n=9$  for tongue and buccal and for A\_HIES  $n=9$  for tongue and  $n=8$  for buccal.  $P$  values were calculated using AMOVA (details of each  $P$  value are in the figure). Some data points are not visible as they get superimposed due to tight clustering

**A**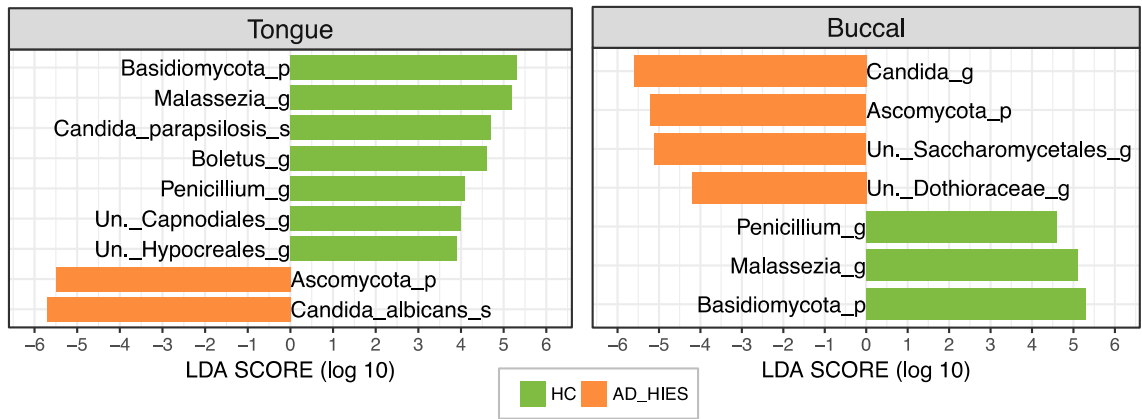**B**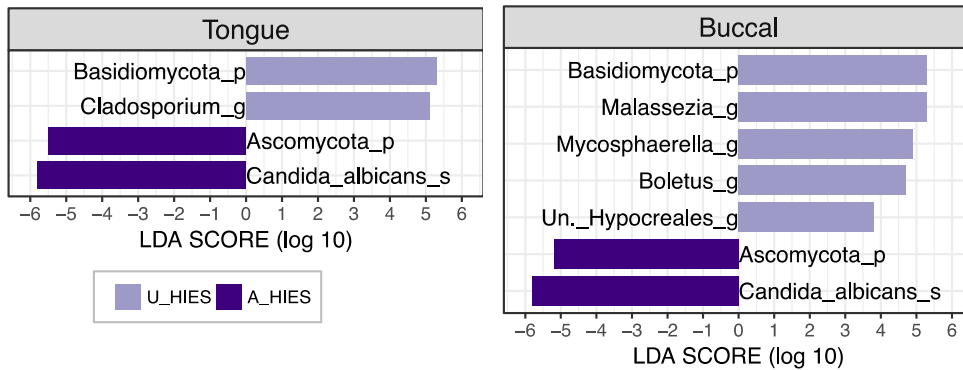

**Supplementary Figure 3. Differential representation of fungal taxa in AD-HIES and healthy controls.** A) Graph shows taxa differentially represented according to LEfSe analysis comparing fungal taxa in healthy controls (HC) and all samples from patients with Autosomal Dominant Hyper IgE Syndrome (AD-HIES) in both tongue (HC, n=23 and AD-HIES, n=18) and buccal surfaces (HC, n=25 and AD-HIES, n=16).

B) Graph depicts taxa found in significantly different proportions via LEfSe analysis comparing fungal taxa between actively infected AD-HIES patients (A\_HIES) and uninfected AD-HIES patients (U\_HIES) in both tongue (U\_HIES and A\_HIES, n=9) and buccal surfaces (U\_HIES and A\_HIES, n=8). The taxonomical level corresponding to each taxa is indicated by \_s (species), \_g (genus) and \_p (phylum).

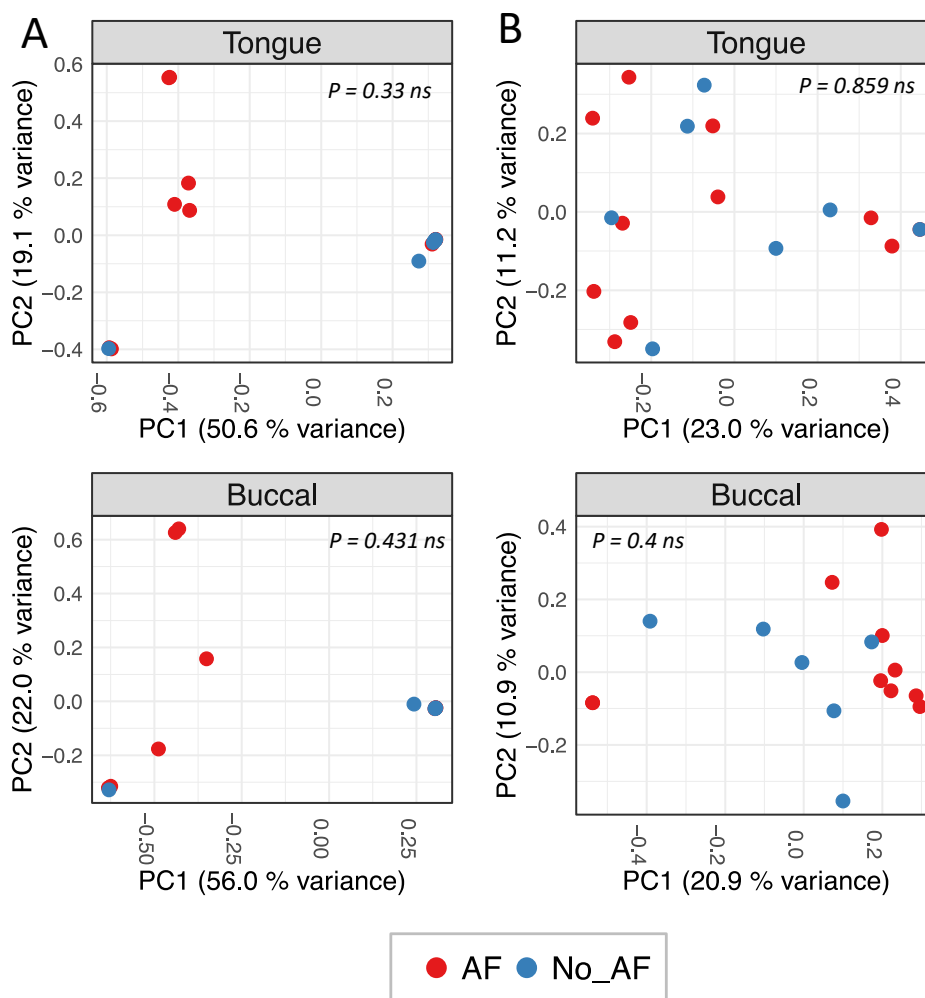

**Supplementary Figure 4. Antifungal prophylaxis does not affect fungal AD-HIES community structure and composition.** Graphs depict Principal Coordinate Analysis (PCoA) of patients with Autosomal Dominant Hyper IgE Syndrome (AD-HIES) samples from patients receiving antifungal prophylaxis (AF) or not (No\_AF), irrespective of their candidiasis status. PCoA are based on the community structure metric (Theta YC distances) (A) and on the community membership measure (Jaccard Index) (B). Each circle represents one patient. For Tongue graphs (AF, n=11 and No\_AF, n=7). For buccal plots (AF, n=10 and No\_AF, n=6). Some data points are not visible as they get superimposed due to tight clustering. *P* values were calculated using AMOVA (details of each *P* value are in the figure).

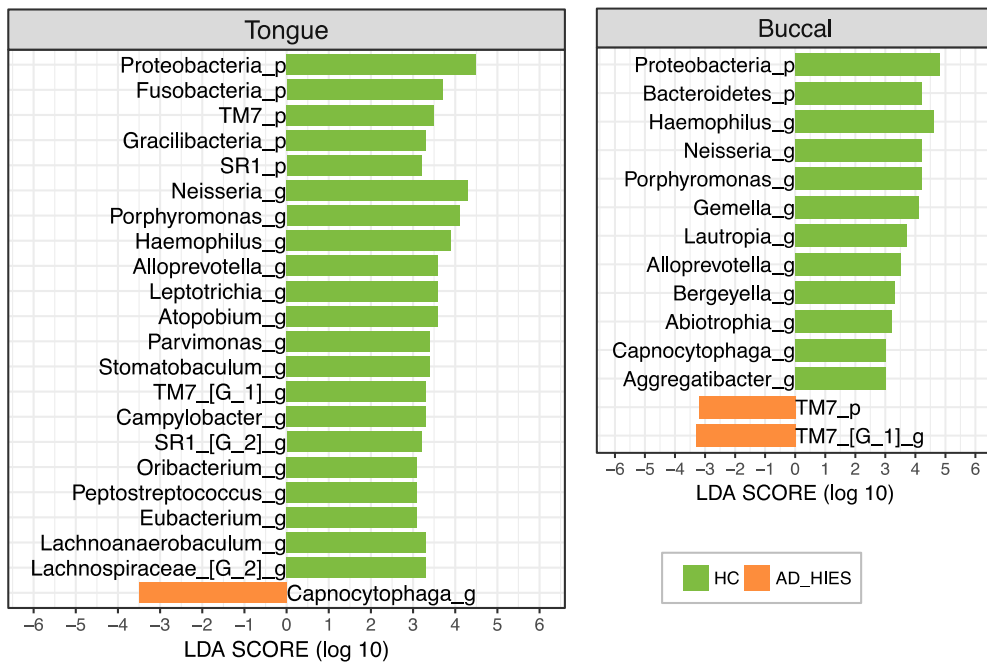

**Supplementary Figure 5. Differentially represented bacterial genera in healthy controls and AD-HIES.** A) Graph shows taxa differentially represented according to LEfSe analysis comparing bacterial taxa in healthy controls (HC) and all samples from patients with Autosomal Dominant Hyper IgE Syndrome (AD-HIES) in both tongue (HC, n=25 and AD-HIES, n=18) and buccal surfaces (HC, n=25 and AD-HIES, n=17) .

**TABLE S1. Demographic and Clinical Information of Healthy Controls and AD-HIES cohort for microbiome study**

|                                                           | Healthy Controls | AD-HIES patients         |
|-----------------------------------------------------------|------------------|--------------------------|
| <b>Subjects analyzed, (n)</b>                             | 25               | 18                       |
| <b>Age, mean (SD)</b>                                     | 33.1 (12.3)      | 35.1 (12.6) <sup>^</sup> |
| <b>Gender, (female:male)</b>                              | (16:9)           | (11:7) <sup>#</sup>      |
| <b>Race, n (%)</b>                                        |                  |                          |
| Caucasian                                                 | 15 (60%)         | 15 (83.3%)               |
| African American                                          | 5 (20%)          | 2 (11.1%)                |
| Other                                                     | 5(20%)           | 1 (5.6%)                 |
| <b>Active oral candidiasis at time of sampling, n (%)</b> | 0                | * 9 (50%)                |
| <b>Antifungal prophylaxis, n (%)</b>                      | 0                | 11 (61.1%)               |
| Posaconazole                                              |                  | 6                        |
| Fluconazole                                               |                  | 3                        |
| Itraconazole                                              |                  | 1                        |
| Voriconazole                                              |                  | 1                        |
| <b>Antibacterial prophylaxis, n (%)</b>                   | 0                | 17 (94.4%)               |
| Sulfamethoxazole/Trimethoprim                             |                  | 8                        |
| Azithromycin                                              |                  | 4                        |
| Doxycycline                                               |                  | 2                        |
| Amoxicillin/Clavulanate                                   |                  | 2                        |
| Levofloxacin                                              |                  | 1                        |
| <b>History of recurrent oral candidiasis, n (%)</b>       | 0                | 15 (83.3%)               |
| <b>History of recurrent oral ulcers, n (%)</b>            | 0                | 7 (38.8%)                |
| <b>Severe dental caries, n (%)</b>                        | 0                | 8 (44.4%)                |
| <b>Xerostomia, n (%)</b>                                  | 0                | 2 (11.1%)                |

<sup>^</sup>  $P = 0.5807$  (ns), <sup>#</sup>  $P > 0.9999$  (ns)

\* From those, 4 patients were receiving antifungal prophylaxis and 5 did not.
